# Supplementary material for: Green electrochemical strategy for one-step synthesis of new catechol derivatives
Source: Royal Society of Chemistry journal article supplement (doi:10.1039/c9ra01206k), 2019-01-01
Supplement: c9ra01206k1.pdf [file c9ra01206k1.pdf]

## Electronic Supplementary Information (ESI)

### Green Electrochemical Strategy for One-step Synthesis of New Catechol Derivatives

Arafat Toghan<sup>1,2\*</sup>, Ahmed M. Abo-Bakr<sup>1</sup>, Hesham M. Rageh<sup>1</sup>, Mohamed Abd-Elsabour<sup>1</sup>

<sup>1</sup>*Chemistry Department, Faculty of Science, South Valley University, Qena 83523, Egypt*

<sup>2</sup>*Chemistry Department, College of Science, Imam Mohammad Ibn Saud Islamic University (IMSIU), Riyadh 11623, KSA*

\* Corresponding author: E-mail address (Arafat Toghan): [arafat.toghan@yahoo.com](mailto:arafat.toghan@yahoo.com)

#### Spectroscopic characterizations of the electro- synthesized products (6, 7, and 8):

After purifications, all the electrochemical synthesized organic products were characterized by using FT-IR (Shimadzu FT-IR 8101 PC). <sup>1</sup>H and <sup>13</sup>C NMR spectra were recorded in DMSO-d<sub>6</sub> at 25 °C using a 300 MHz and 75 MHz Varian Mercury VX “NMR300” spectrometer, respectively. All chemical shifts for NMR spectra were measured in form of ppm with δ units relative to TMS in DMSO-d<sub>6</sub> as an internal standard. Electron impact mass spectra were obtained at 70 eV using a GCMS-QP 1000 EX Shimadzu spectrometer. Both elemental analysis using elemental C,H,N,S Analyzer- Vario EL III Germany, mass (MS) and NMR spectra were carried out at the Microanalytical Center of Cairo University. Melting points (uncorrected) were recorded on melting point apparatus SMP 10. The results indicate that the formed electro-synthesized organic products are mainly depending on the nature of the nucleophilic reagent (3, 4, or 5) used. The spectroscopic data of the electrosynthesized products 6, 7 or 8 via Michael addition reaction are summarized as the following:

## Product number 6:

**Name:** 4-(4-Amino-5-benzyl-4H-[1,2,4]triazol-3-ylsulfanyl)-benzene-1,2-diol

**Data:** Yellowish white crystals Yield: 0.26 g, 82.8 %, mp: 159 oC. IR spectrum (KBr) ,  $\nu$ ,  $\text{cm}^{-1}$ : 3400 (br. OH), 3287, 3238 ( $\text{NH}_2$ ), 3085 (CH-aromatic), 2935 ( $\text{CH}_2$ ), 1624 ( $\text{C}=\text{N}$ );  $^1\text{H}$  NMR ( $\text{DMSO-d}_6$ ) ( $\delta$  ppm): 9.4 (br.s, 1H, OH), 9.1 (s, 1H, OH), 7.36-7.21 (m, 8H, Ar'H), 5.54 (s, 2H,  $\text{NH}_2$ ), 4.02 (s, 2H,  $\text{CH}_2$ );  $^{13}\text{C}$  NMR spectrum (75 MHz,  $\text{DMSO-d}_6$ ) ( $\delta$ , ppm): 28.55 ( $\text{CH}_2$ ), 115.27, 120.72, 127.05, 127.19, 128.58, 128.88, 134.00, 134.12 (Ar-C), 144.01 (Ar-OH), 146.95 (Ar-OH), 151.53 ( $\text{C}=\text{N}$ ), 160.91 ( $\text{C}=\text{N}$ ); Ms:  $m/z$  314 ( $\text{M}^+$ ). Anal. Calcd for  $\text{C}_{15}\text{H}_{14}\text{N}_4\text{O}_2\text{S}$ ; C, 57.31; H, 4.49; N, 17.82; S, 10.20. Found: C, 57.92; H, 4.71; N, 17.16; S, 10.03.

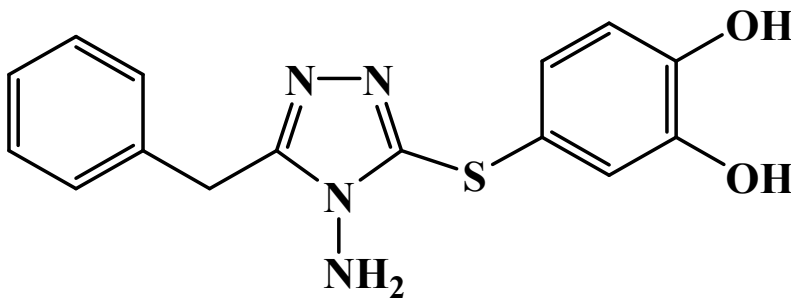

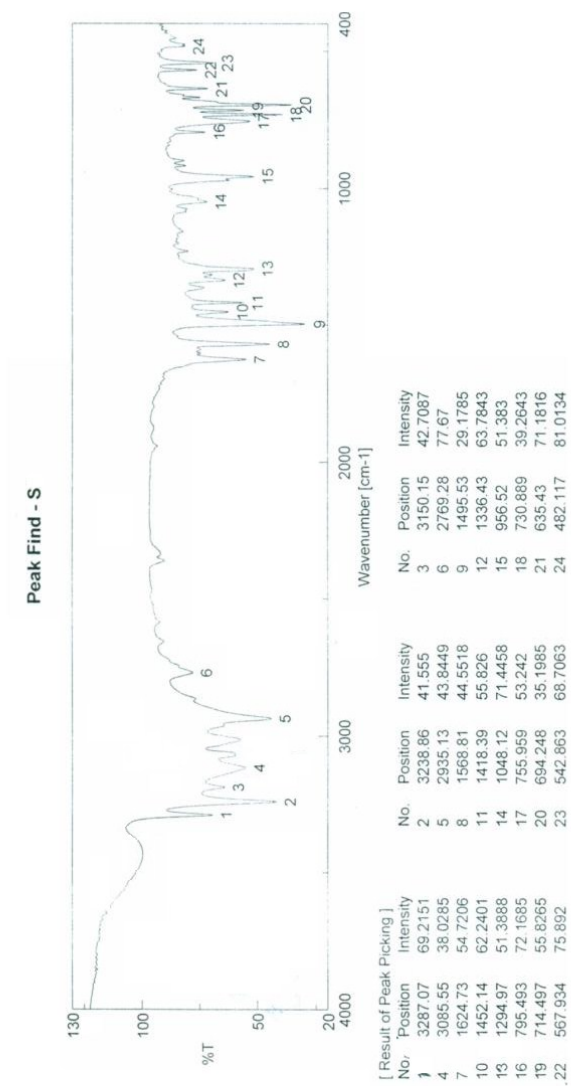

FT-IR results for the product number 6.

# Cairo University Micro Analytical Center

## DI Analysis Shimadzu Qp-2010 Plus

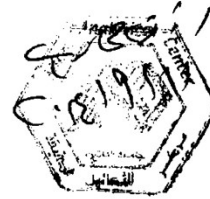

### Sample Information

Analyzed by : Mai Younis  
 Analyzed : 10/09/2014 04:47:44  
 Sample Name : S1  
 Sample ID :  
 Customer Name : Dr. Ahmed Mohamed Abo Bakr - El-wadi South  
 Data File : C:\GCMSolution\Data\Project1\B32.QGD  
 Org Data File : C:\GCMSolution\Data\Project1\B32.QGD  
 Method File : C:\GCMSolution\Data\Project1\A.GABR.qgm  
 Org Method File : C:\GCMSolution\Data\Project1\A.GABR.qgm  
 Report File :  
 Tuning File : C:\GCMSolution\System\Tune1\\_default1.qgt  
 SEndiTS Modified by : Mai Younis  
 Modified : 10/09/2014 04:51:12

### Method

Analytical Line 1  
 IonSourceTemp : 250.00 °C  
 [MS Table]  
 -Group 1 - Event 1-  
 Start Time : 0.00min  
 End Time : 10.00min  
 ACQ Mode : Scan  
 Event Time : 0.50sec  
 Scan Speed : 1428  
 Start m/z : 50.00  
 End m/z : 700.00  
 Electron Voltage : 70 eV  
 Ionization Mode : EI

C:\GCMSolution\Data\Project1\B32.QGD

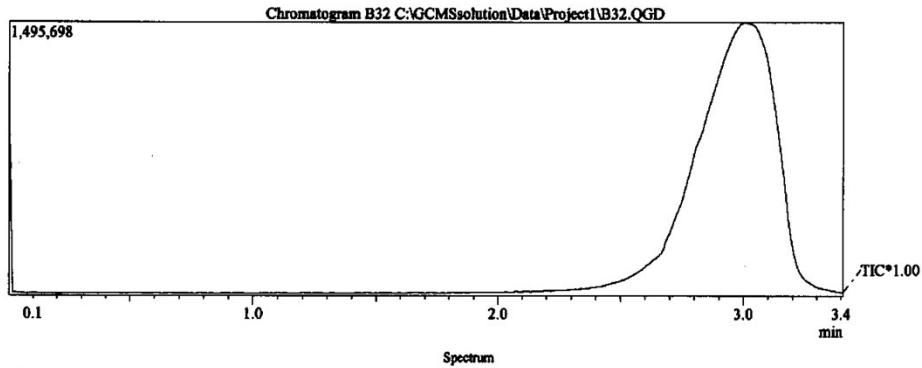

Line#:1 R.Time:3.0(Scan#:364)  
 MassPeaks:225  
 RawMode:Single 3.0(364) BasePeak:91(246006)  
 BG Mode:None Group 1 - Event 1

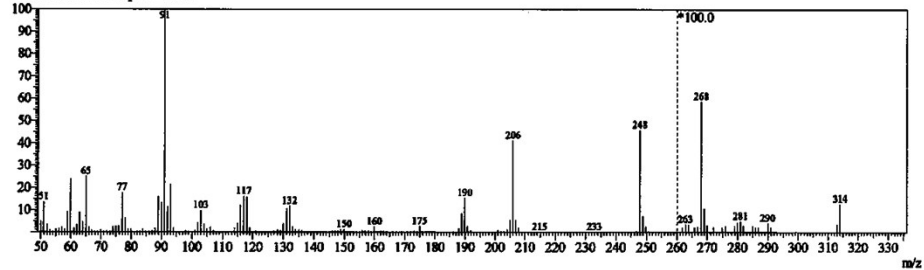

### Mass Table

Line#:1 R.Time:3.0(Scan#:364)

MassPeaks:225

RawMode:Single 3.0(364) BasePeak:91(246006)

BG Mode:None Group 1 - Event 1

| # | m/z   | Abs. In | Rel. Int. | # | m/z   | Abs. In | Rel. Int. | # | m/z   | Abs. In | Rel. Int. |
|---|-------|---------|-----------|---|-------|---------|-----------|---|-------|---------|-----------|
| 1 | 50.00 | 12151   | 4.94      | 4 | 53.00 | 2575    | 1.05      | 7 | 56.00 | 3956    | 1.61      |
| 2 | 50.95 | 33376   | 13.57     | 5 | 54.00 | 791     | 0.32      | 8 | 56.95 | 5393    | 2.19      |
| 3 | 52.00 | 8281    | 3.37      | 6 | 55.00 | 3945    | 1.60      | 9 | 57.95 | 3636    | 1.48      |

MS results for the product number 6.

AhmadAbubakr-1-DMSO-H  
 Archive directory: /export/home/vnmr1/vnmrSYS/data  
 Sample directory: DD5mm\_test\_12Mar2014-21:34:40  
 File: PROTON  
 Pulse Sequence: s2pul  
 Solvent: DMSO  
 Temp: 30.0 C / 303.1 K  
 Mercury-300BB "NMR300"  
 Relax. delay 1.000 sec  
 Acq. time 0.455 sec  
 Width 6600.7 Hz  
 5 repetitions  
 OBSERVED F1 300.0637871 MHz  
 UNPROCESSED F1 300.0637871 MHz  
 F1 size 65536  
 Total time 43 min, 34 sec  
 Date: Aug 4 2015

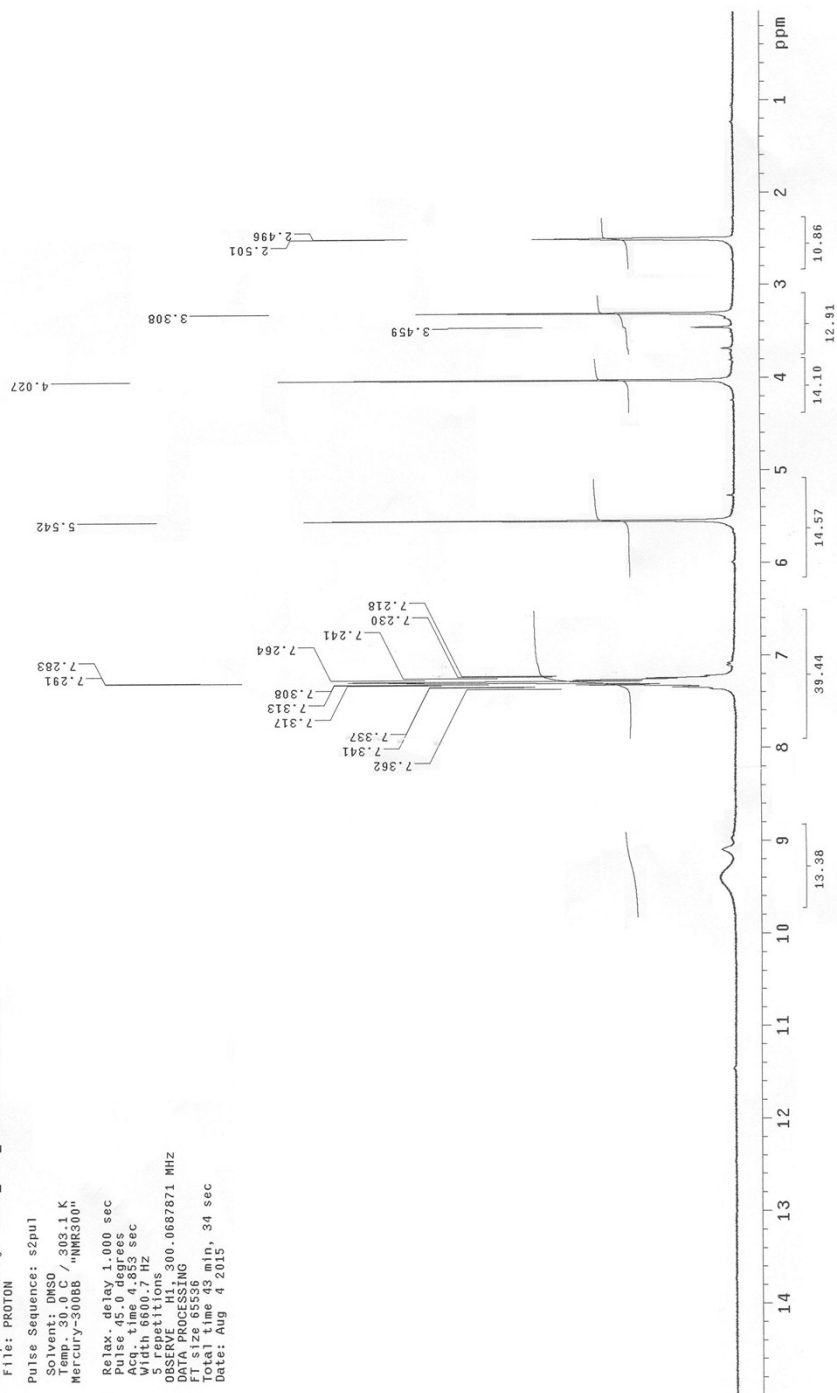

$^1\text{H}$  NMR results for the product number 6.

AhmadAboBakra-S1-DMSO-13C  
 Archive directory: /export/home/vnmr1/vnmrsys/data  
 Sample directory: D05ma\_test\_10Feb2018-21:34:40  
 Pulse Sequence: s2pul1  
 Solvent: DMSO  
 Temp. 30.0 C / 303.1 K  
 File:  
 Mercury-300BB "NMR300"  
 Pulse 45.0 degrees  
 Acq. time 1.815 sec  
 Width 18761.7 Hz  
 1144 repetitions  
 OBSERVE C13, 75.4523854 MHz  
 DECOUPLE H1, 300.0702830 MHz  
 Power 33 dB  
 continuously on  
 WALTZ-16 modulated  
 DATA PROCESSING  
 Line broadening 1.0 Hz  
 FT size 131072  
 Total time 8 hr. 18 min. 50 sec  
 Date: Feb 10 2018

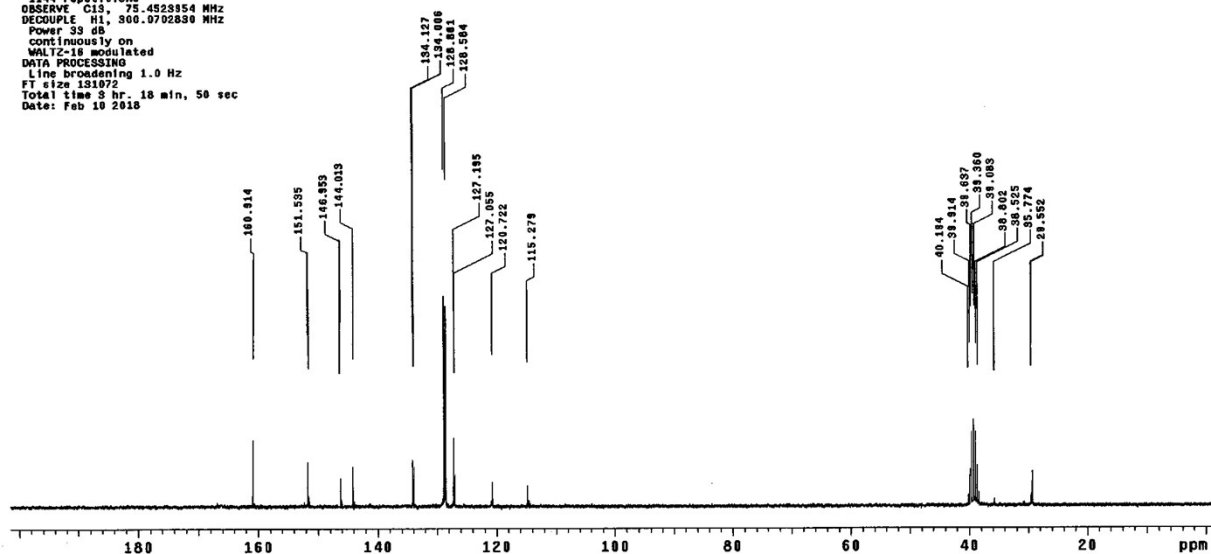

$^{13}\text{C}$  NMR results for the product number 6.

## Product number 7:

**Name:** 5,6-(Diphenyl-[1,2,4]triazin-3-ylsulfanyl)-benzene-1,2-diol

**Data:** Pale yellow crystals, Yield: 0.23 g, 61.6 %, mp: 175 oC. IR spectrum (KBr) ,  $\nu$ ,  $\text{cm}^{-1}$ : 3430 (br. OH), 3050 (CH-aromatic), 1596 (C=N);  $^1\text{H}$  NMR (DMSO- $d_6$ ) ( $\delta$  ppm): 9.04 (br.s, 2H, 2OH), 7.46-7.29 (m, 13H, Ar'H);  $^{13}\text{C}$  NMR spectrum (75 MHz, DMSO- $d_6$ ) ( $\delta$ , ppm): 113.88, 120.52, 121.00, 126.86, 128.47, 128.67, 132.12, 135.05 (Ar-C), 144.38 (Ar-OH), 147.17 (Ar-OH), 153.18 (C=N), 153.83 (C=N), 157.84 (N=C-S); Ms:  $m/z$  373 ( $M^+$ ). Anal. Calcd for  $\text{C}_{21}\text{H}_{15}\text{N}_3\text{O}_2\text{S}$ ; C, 67.54; H, 4.05; N, 11.25; S, 8.59. Found: C, 67.17; H, 4.86; N, 11.34; S, 8.06.

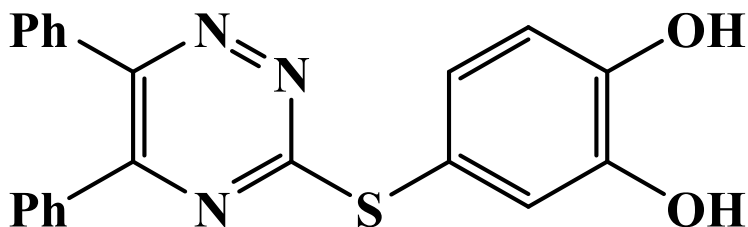

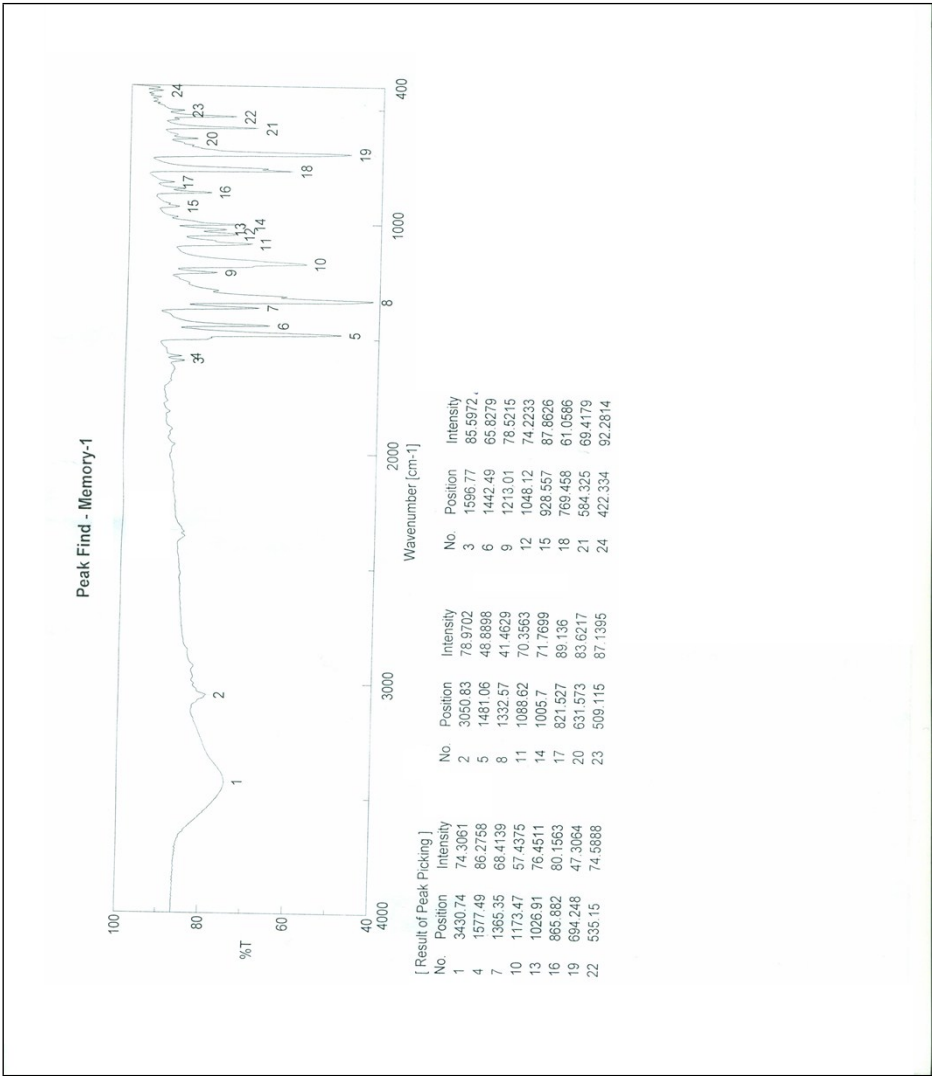

FT-IR results for the product number 7.



# Cairo University Micro Analytical Center

## DI Analysis Shimadzu Qp-2010 Plus

Sample Information  
Analyzed by : A.GABR  
Analyzed : 05/03/2014 05:37:45  
Sample Name : S2  
Sample ID :  
Customer Name : احمد محمد ابو بكر - حارم كا  
Data File : C:\GCMSolution\Data\Project\VB8.QGD  
Log Data File : C:\GCMSolution\Data\Project\VB8.QGD  
Method File : C:\GCMSolution\Data\Project\VA.GABR.qgm  
Org Method File : C:\GCMSolution\Data\Project\VA.GABR.qgm  
Report File : C:\GCMSolution\SystemTune\1\_default1.qst  
Tuning File : A.GABR  
\$Eqz\$Modified by : A.GABR  
Modified : 05/03/2014 05:40:04

### Method

Analytical Line 1  
IonSourceTemp : 250.00 °C  
[MS Table]  
-Group 1 - Event 1-  
Start Time : 0.00min  
End Time : 10.00min  
ACQ Mode : Scan  
Event Time : 0.50sec  
Scan Speed : 769  
Start m/z : 50.00  
End m/z : 400.00

Electron Voltage : 70 eV  
Ionization Mode : EI

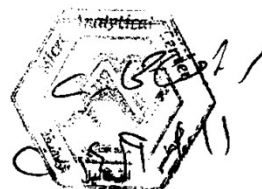

C:\GCMSolution\Data\Project\VB8.QGD

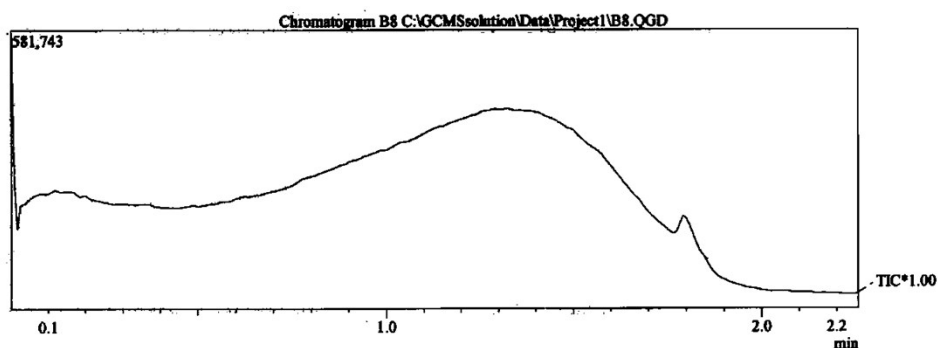

Line#:1 R.Time:1.6(Scan#:197)

MassPeaks:79

RawMode:Single 1.6(197) BasePeak:157(94)

BG Mode:Averaged 1.6-1.6(195-195) Group 1 - Event 1

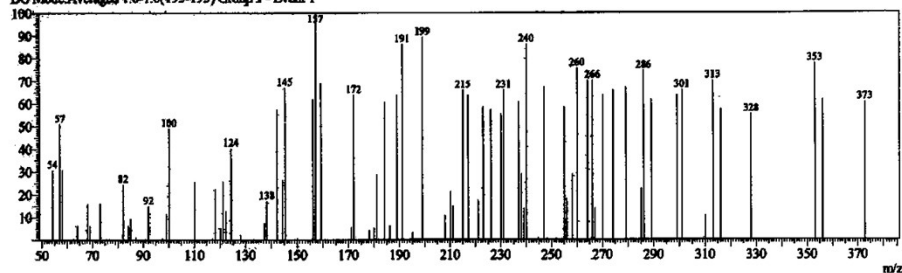

### Mass Table

Line#:1 R.Time:1.6(Scan#:197)

MassPeaks:79

RawMode:Single 1.6(197) BasePeak:157(94)

BG Mode:Averaged 1.6-1.6(195-195) Group 1 - Event 1

| # | m/z   | Abs. In | Rel. Int. | # | m/z   | Abs. In | Rel. Int. | # | m/z   | Abs. In | Rel. Int. |
|---|-------|---------|-----------|---|-------|---------|-----------|---|-------|---------|-----------|
| 1 | 54.15 | 29      | 30.85     | 4 | 64.10 | 6       | 6.38      | 7 | 73.05 | 15      | 15.96     |
| 2 | 57.10 | 48      | 51.06     | 5 | 68.10 | 15      | 15.96     | 8 | 82.15 | 23      | 24.47     |
| 3 | 58.05 | 29      | 30.85     | 6 | 69.10 | 6       | 6.38      | 9 | 84.10 | 6       | 6.38      |

MS results for the product number 7.

AhmadAbubakar-2-DMSO-H  
 Archive directory: /export/home/vmar1/vnmrsys/data  
 Sample directory: D05mm\_test\_12Mar2014-21:54:40  
 File: PROT0N  
 Pulse Sequence: s2pu1  
 Solvent: DMSO  
 Temp: 30.0 C / 303.1 K  
 Mercury-300BB "NMR300"  
 Relax delay 1.000 sec  
 Pulse delay 0.000 sec  
 Acq. time 4.853 sec  
 Width 6600.7 Hz  
 12 repetitions  
 OBSERVED F3 300.0637871 MHz  
 DATA PROCESSING  
 FT size 65536  
 Total time 43 min, 34 sec  
 Date: Aug 4 2015

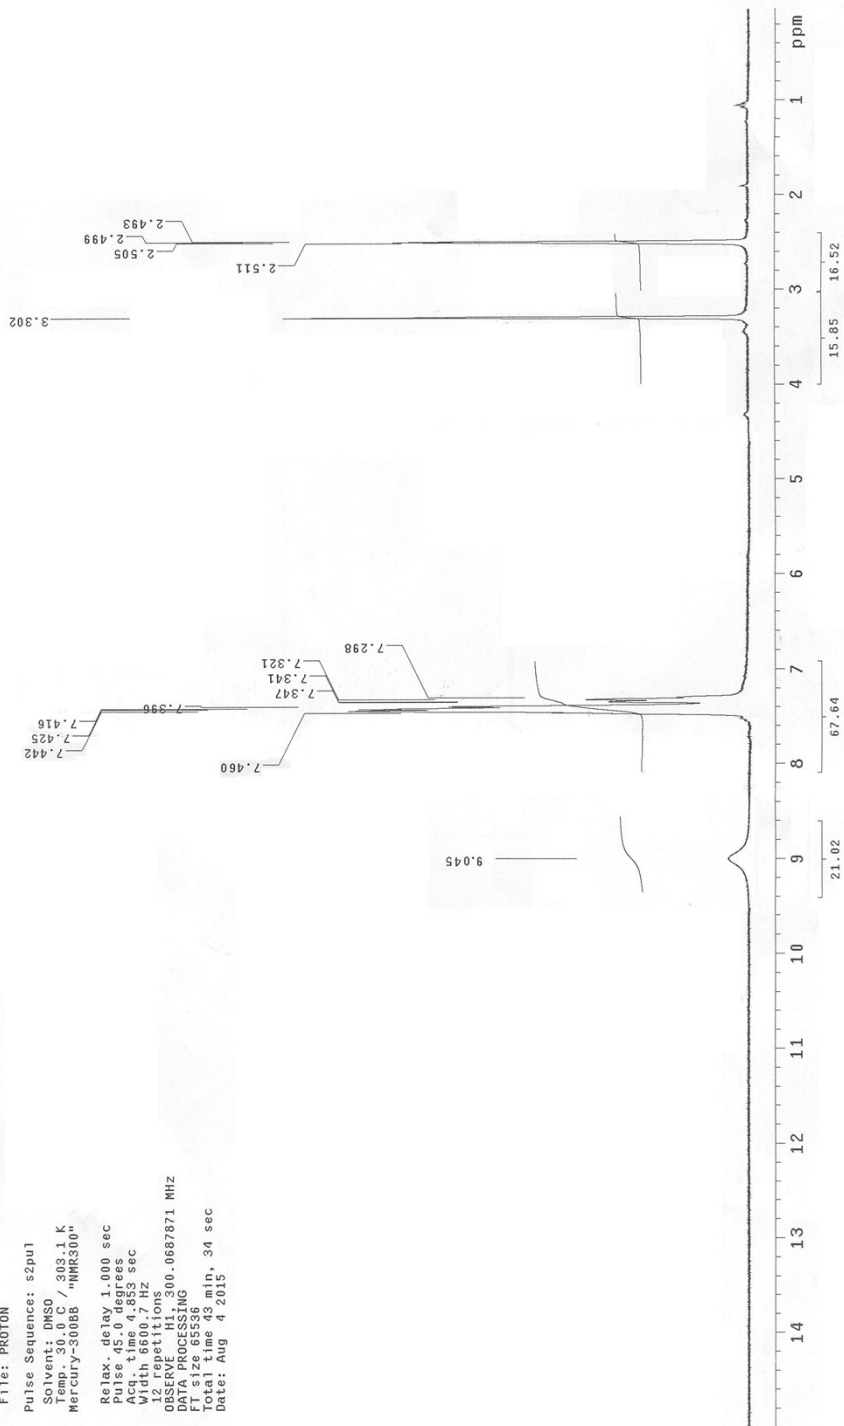

<sup>1</sup>H NMR results for the product number 7.

AhmadAbuBakre-S2-DMSO-13C  
Archive directory: /export/home/vnmr1/vnmrsys/data  
Sample directory: D05mm\_test\_12Feb2018-22:43:40  
Pulse Sequence: s2pul  
Solvent: DMSO  
Temp: 38.8 C / 303.1 K  
File:  
Mercury-30088 "NMR300"

Pulse 45.0 degrees  
Acq. time 1.815 sec  
Width 18761.7 Hz  
720 repetitions  
OBSERVE C13, 75.4523854 MHz  
DECOUPLE H1, 300.0702830 MHz  
Power 33 db  
continuously on  
WALTZ-16 modulated  
DATA PROCESSING  
Line broadening 1.0 Hz  
FT size 131072  
Total time 3 hr, 17 min, 51 sec  
Date: Feb 12 2018

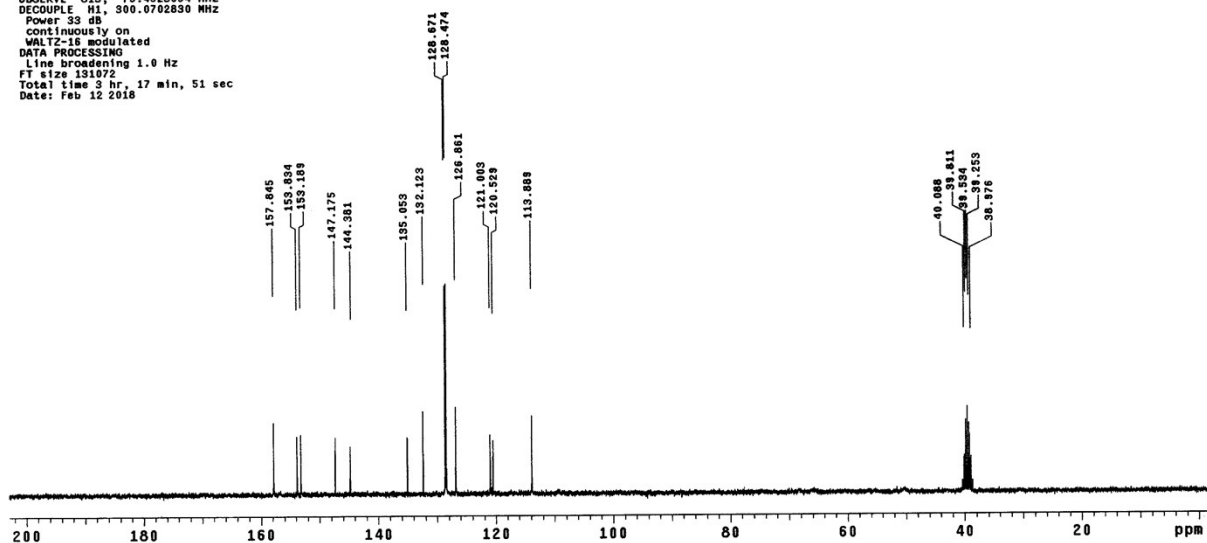

$^{13}\text{C}$  NMR results for the product number 7.

## Product number 8:

**Name:** 6-(3,4-Dihydroxy-phenylsulfanyl)-1H-pyrimidine-2,4-dione

**Data:** Brown crystals Yield: 0.2 g, 79.3 %, mp: 193 oC. IR spectrum (KBr) ,  $\nu$ ,  $\text{cm}^{-1}$ : 3443 (br. OH), 1703 (C=O);  $^1\text{H}$  NMR (DMSO- $d_6$ ) ( $\delta$  ppm): 11.71 (br.s, 2H, 2OH), 11.08 (s, 1H, NH), 6.96-6.55 (m, 3H, Ar'H), 1.90 (s, 2H,  $\text{CH}_2$ );  $^{13}\text{C}$  NMR spectrum (75 MHz, DMSO- $d_6$ ) ( $\delta$ , ppm): 31.83 ( $\text{CH}_2$ ), 116.20, 120.72, 122.33, 127.69 (Ar-C), 145.32 (Ar-OH), 147.65 (Ar-OH), 162.36 (S-C=N)), 166.55 (C=O), 167.98 (C=O); Ms:  $m/z$  252 ( $\text{M}^+$ ). Anal. Calcd for  $\text{C}_{10}\text{H}_8\text{N}_2\text{O}_4\text{S}$ ; C, 47.61; H, 3.20; N, 11.11; S, 12.71. Found: C, 47.56; H, 3.13; N, 11.45; S, 12.49.

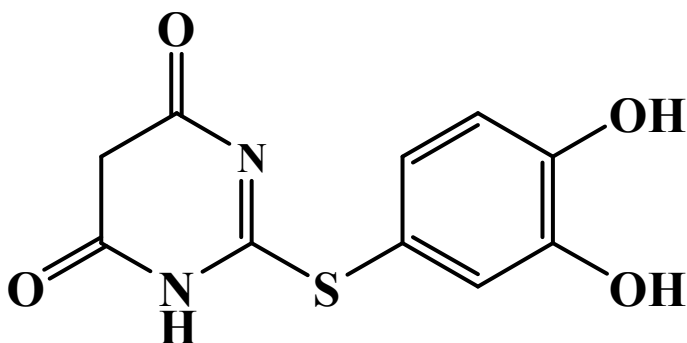

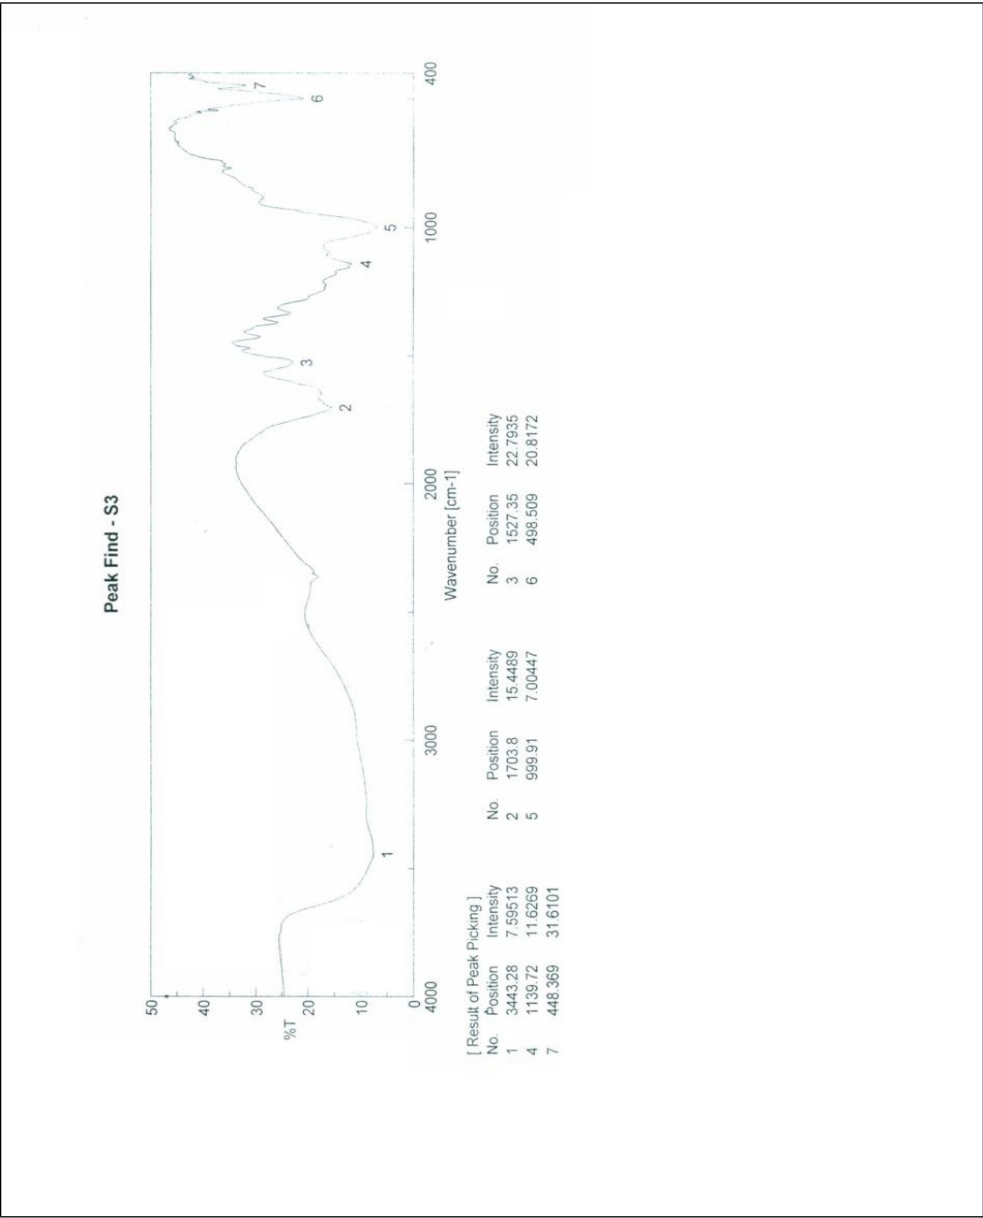

FT-IR results for the product number **8**.

# Cairo University Micro Analytical Center

## DI Analysis Shimadzu Qp-2010 Plus

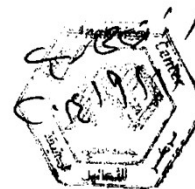

Sample Information  
Analyzed by : A.GABR  
Analyzed : 02/01/2014 11:33:10  
Sample Name : S3  
Sample ID :  
Customer Name : أحمد محمد أبو بكر - جامعة جازان  
Data File : C:\GCMSolution\Data\Project\1\1.QGD  
Org Data File : C:\GCMSolution\Data\Project\1\1.QGD  
Method File : C:\GCMSolution\Data\Project\1\A.GABR.qgm  
Org Method File : C:\GCMSolution\Data\Project\1\A.GABR.qgm  
Report File :  
Tuning File : C:\GCMSolution\System\Tune\1\_default1.qgt  
\$EndIS Modified by : A.GABR  
Modified : 02/01/2014 11:38:14

Method  
Analytical Line 1  
IonSourceTemp : 250.00 °C  
[MS Table]  
-Group 1 - Event 1-  
Start Time : 0.00min  
End Time : 10.00min  
ACQ Mode : Scan  
Event Time : 0.50sec  
Scan Speed : 625  
Start m/z : 50.00  
End m/z : 350.00

Electron Voltage : 70 eV  
Ionization Mode : EI

C:\GCMSolution\Data\Project\1\1.QGD

Chromatogram 1 C:\GCMSolution\Data\Project\1\1.QGD

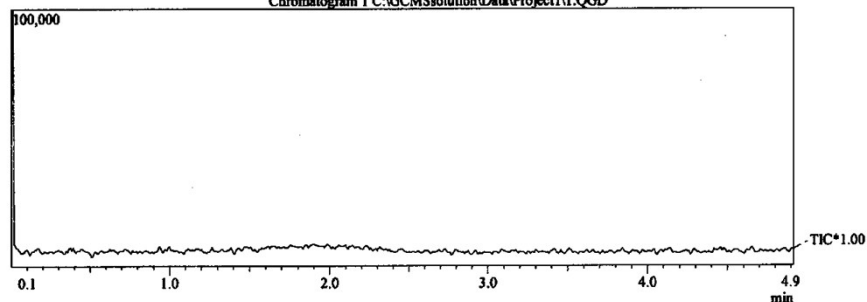

Spectrum

Line#1 R.Time:3.5(Scan#:423)  
MassPeaks:69  
RawMode:Single 3.5(423) BasePeak:64(183)  
BG Mode:None Group 1 - Event 1

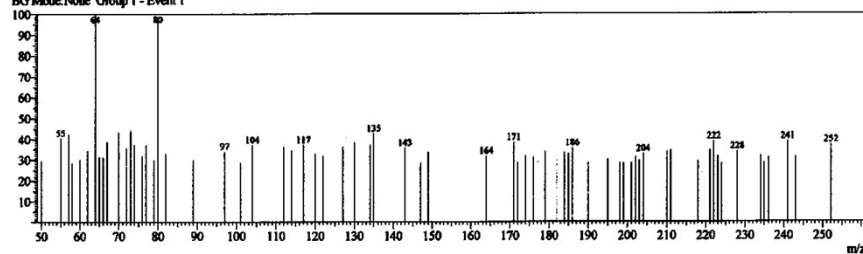

### Mass Table

Line#1 R.Time:3.5(Scan#:423)

MassPeaks:69

RawMode:Single 3.5(423) BasePeak:64(183)

BG Mode:None Group 1 - Event 1

| # | m/z   | Abs. In | Rel. Int. | # | m/z   | Abs. In | Rel. Int. | # | m/z   | Abs. In | Rel. Int. |
|---|-------|---------|-----------|---|-------|---------|-----------|---|-------|---------|-----------|
| 1 | 50.00 | 54      | 29.51     | 4 | 58.00 | 52      | 28.42     | 7 | 64.00 | 183     | 100.00    |
| 2 | 55.00 | 74      | 40.44     | 5 | 60.00 | 55      | 30.05     | 8 | 65.00 | 57      | 31.15     |
| 3 | 57.00 | 78      | 42.62     | 6 | 62.00 | 63      | 34.43     | 9 | 66.00 | 57      | 31.15     |

MS results for the product number 8.

AhmadAbubakr-3-DMSO-H  
 Archive directory: /export/home/vmm1/vmmr/sys/data  
 Sample directory: DD5mm\_test\_12Mar2014-21:34:40  
 File: PROTON

Pulse Sequence: s2pu1  
 Solvent: DMSO  
 Temp: 30.0 C / 303.1 K  
 Mercury-300BB "NMR300"

Relax. delay 1.000 sec  
 Pulse 45.0 degrees  
 Acq. time 4.353 sec  
 Width 6600.7 Hz  
 Repetitions 4  
 Acquisition 00.0687571 MHz  
 DATA PROCESSING  
 FT size 65536  
 Total time 43 min, 34 sec  
 Date: Aug 4 2015

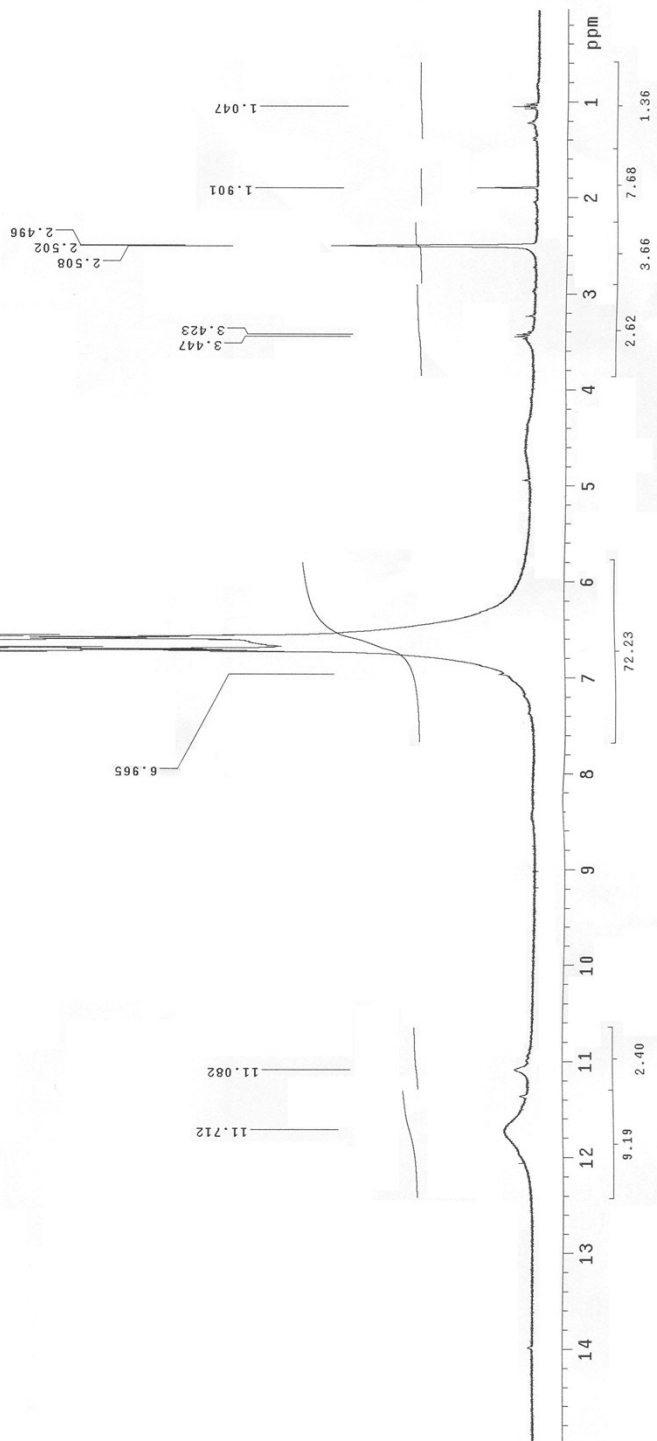

<sup>1</sup>H NMR results for the product number 8.

AhmadAboBakra-S3-DMSO-13C  
 Archive directory: /export/home/vnmr1/vnmrnsys/data  
 Sample directory: DDSmm\_test\_12Feb2018-18:21:45  
 Pulse Sequence: s2pul1  
 Solvent: DMSO  
 Temp. 30.0 C / 303.1 K  
 File:  
 Mercury-300BB "NMRS00"  
 Pulse 45.0 degrees  
 Acq. time 1.815 sec  
 Width 18781.7 Hz  
 1100 repetitions  
 OBSERVE C13, 75.4528854 MHz  
 DECOUPLE H1, 300.0702830 MHz  
 Power 33 dB  
 continuously on  
 WALTZ-16 modulated  
 DATA PROCESSING  
 Line broadening 1.0 Hz  
 FT size 131072  
 Total time 3 hr, 17 min, 52 sec  
 Date: Feb 12 2018

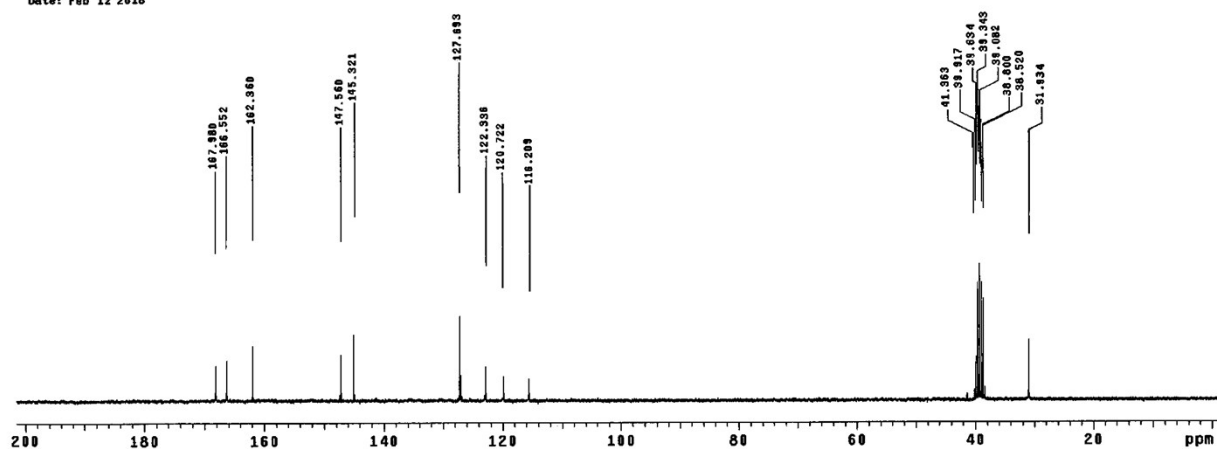

$^{13}\text{C}$  NMR results for the product number 8.
